# Supplementary material for: Methotrexate and Valproic Acid Affect Early Neurogenesis of Human Amniotic Fluid Stem Cells from Myelomeningocele
Source: Hindawi journal article supplement (doi:10.1155/2017/6101609), 2017-01-01
Supplement: f1 [file 6101609.f1.pdf]

## Supporting Information Table S1

### Primers List

| Gene   | Forward primer             | Reverse primer            |
|--------|----------------------------|---------------------------|
| GAPDH  | TCAAGAAGGTGGTGAAGCAGG      | ACCAGGAAATGAGCTTGACAAA    |
| OCT4   | CGAGCAATTTGCCAAGCTCCTGAA   | GCCGCAGCTTACACATGTTCTTGA  |
| SOX2   | TGGCGAACCATCTCTGTGGT       | CCAACGGTGTCAACCTGCAT      |
| NANOG  | TGGCCGAAGAATAGCAATGGTGTG   | TTCCAGGTCTGGTTGCTCCACATT  |
| PAX6   | GTGTCCAACGGATGTGTGAG       | CTAGCCAGGTTGCGAAGAAC      |
| BLBP   | GGA CTCTCAGCACATTCAAGAA    | CCACATCACCAAAAGTAAGGGT    |
| NESTIN | CAGCGTTGGAACAGAGGTTGG      | TGGCACAGGTGTCTCAAGGGTAG   |
| PAX3   | GCCGCATCCTGAGAAGTAAA       | CTTCATCTGATTGGGGTGC       |
| PAX7   | GAGGATGAAGCGGACAAGAA       | TCAGTGGGAGGTGAGGTT        |
| COL2A1 | GGCAATAGCAGGTTACGTACA      | CGATAACAGTCTTGCCCCACTT    |
| RUNX2  | CATGGTGAGATCATCGC          | ACTCTGCCTCGTCCACTC        |
| POU4F2 | GGGCAAGAGCCATCCTTTCAA      | CTGTTTCATCGTGTGGTACGTG    |
| RELN   | G TAGCAAGCCCTTCAGCAAC      | CCCTGAGGCCAGTACAACAT      |
| PDGFRA | GATTAAGCCGGTCCCAACCT       | GGATCTGGCCGTGGGTTT        |
| MYH3   | GCCCTTTGACATTCGCACTG       | CGGGACAAAATCTTGGCTTTGA    |
| PDGFRB | TGGCAGAAGAAGCCACGTT        | GGCCGTGAGAGCTCACAGA       |
| OCN    | ATGAGAGCCCTCACACTCCTC      | GCCGTAGAAGCGCCGATAGGC     |
| SOX9   | GACTTCCGCGACGTGGAC         | GTTGGGCGGCAGGTACTG        |
| ACAN   | TCGAGGACAGCGAGGCC          | TCGAGGGTGTAGCGTGTAGAGA    |
| MIXL1  | GGATCCAGGTATGGTTCCAG       | CATGAGTCCAGCTTTGAACC      |
| GATA4  | TCCAAACCAGAAAACGGAAG       | CTGTGCCCCGTAGTGAGATGA     |
| FOXA1  | AGGCCTACTCCTCCGTCCTCG      | CTAGGCCCGGGTTGGCATAGG     |
| DLX5   | CGCCTCGCTGGGATTG           | CTTGATCTGGATCTTTTGTCTGAA  |
| SOX17  | CGCTTTCATGGTGTGGGCTAAGGACG | TAGTTGGGGTGGTCTGCATGTGCTG |
| GATA6  | CTCAGTTCCTACGCTTCGCAT      | GTCGAGGTGAGTGAACAGCA      |
| FOXA1  | GCAATACTCGCCTTACGGCT       | TACACACCTTGGTAGTACGCC     |
| BRACH  | ACCCAGTTCATAGCGGTGAC       | AAGCTTTTGCAAATGGATTG      |
| MYOD   | CGCCATCCGCTATATCGAGG       | CTGTAGTCCATCATGCCGTCG     |
| FOXG1  | GAGCGACGACGTGTTTCATC       | GCCGTTGTAAC TCAAAGTGCTG   |
